# Supplementary material for: Platelet Count to Spleen Diameter Ratio for the Diagnosis of Gastroesophageal Varices in Liver Cirrhosis: A Systematic Review and Meta-Analysis
Source: Gastroenterol Res Pract. 2017 Feb 8;2017:7407506. doi: 10.1155/2017/7407506 (PMC5320338; doi:10.1155/2017/7407506)
Supplement: Supplementary file 1 — Supplementary Material includes two parts. Supplementary Table 1 described the diagnostic value of included studies. Supplementary Table 2 described the QUADAS-2 results. [file 7407506.f1.zip]

Archive with 2 entries (2 files):
- Supplementary Table 1_GRP_1819155.docx
- Supplementary Table 2_GRP_1819156.docx
